# Supplementary material for: The self-aggregation of fluorophore-triphenylamine nanostructures with tunable luminescent properties: the effect of acidity and rare earth ions
Source: Royal Society of Chemistry journal article supplement (doi:10.1039/c3ra47893a), 2014-01-01
Supplement: c3ra47893a1.pdf [file c3ra47893a1.pdf]

Supporting information for:

## Self-aggregation of fluorophore-triphenylamine nanostructures with tunable luminescent properties: effect of acidity and rare earth ions

Qi-yu Chen, Lin Kong, Yu-peng Tian, Xian-yun Xu, Long-Mei Yang, Gao-bin Zhang,  
Wen-bin Jia, Jia-xiang Yang

### Contents:

1. Selected bond lengths [ $\text{\AA}$ ] and angles [ $^\circ$ ] for **L**;
2. The packing structure of the crystal **L**;
3. SEM images of **L** nanostructures prepared in pH = 4;
4. SEM images of nanostructures of **L** with the excess concentration of  $\text{Tm}^{3+}$ ;
5. SEM images of hexagonal prisms nanostructures when the  $\text{Yb}^{3+}$  was added to acidic aqueous solution of pH = 3.
6. XRD patterns of **L** nanorods and **L**-RE nanohybrids, respectively.

**Table S1** Selected bond lengths ( $\text{\AA}$ ) and angles ( $^\circ$ ) for of **L**

|                   |           |                   |           |
|-------------------|-----------|-------------------|-----------|
| N(1)-C(13)        | 1.356(12) | C(21)-O(1)        | 1.301(11) |
| N(1)-C(6)         | 1.410(8)  | C(21)-O(2)        | 1.178(12) |
| N(1)-C(13)        | 1.356(12) | C(13)-C(14)       | 1.351(12) |
| C(18)-C(19)       | 1.399(12) | C(13)-C(15)       | 1.393(13) |
| C(19)-C(20)       | 1.286(12) | C(7)-C(8)         | 1.356(12) |
| C(20)-C(21)       | 1.433(14) | C(1)-C(6)         | 1.371(11) |
| C(7)-N(1)-C(13)   | 122.6(6)  | C(6)-N(1)-C(7)    | 117.4(7)  |
| C(6)-N(1)-C(13)   | 119.2(7)  | C(18)-C(19)-C(20) | 129.3(9)  |
| C(19)-C(20)-C(21) | 121.0(9)  | O(2)-C(21)-O(1)   | 120.9(9)  |

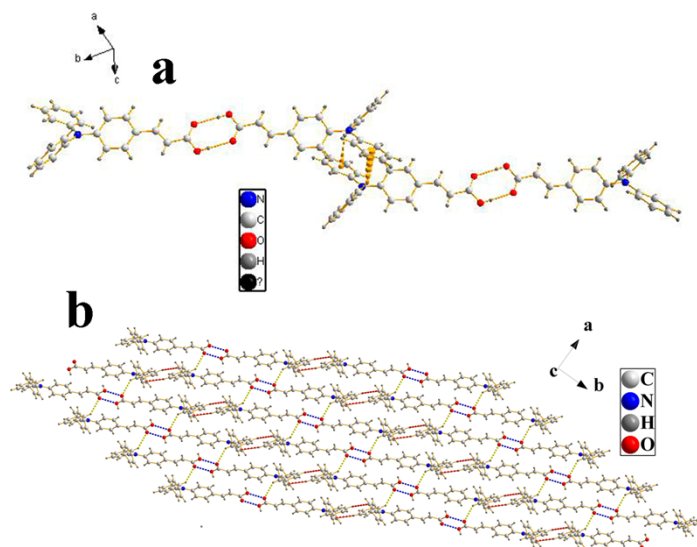

**Fig. S1.** (a) the packing structure of L through C-H...C weak interactions, (b) the supramolecular self-assembly packing diagram.

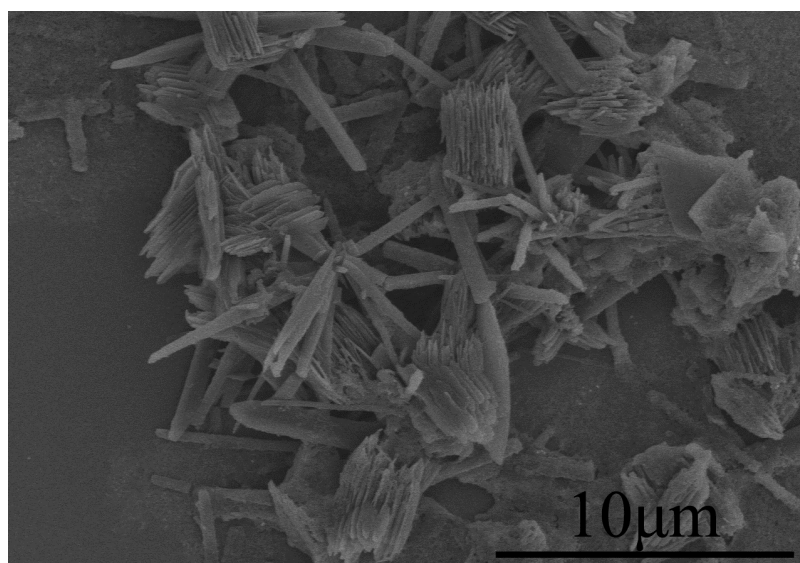

**Fig. S2** SEM images of L nanostructures prepared in pH = 4

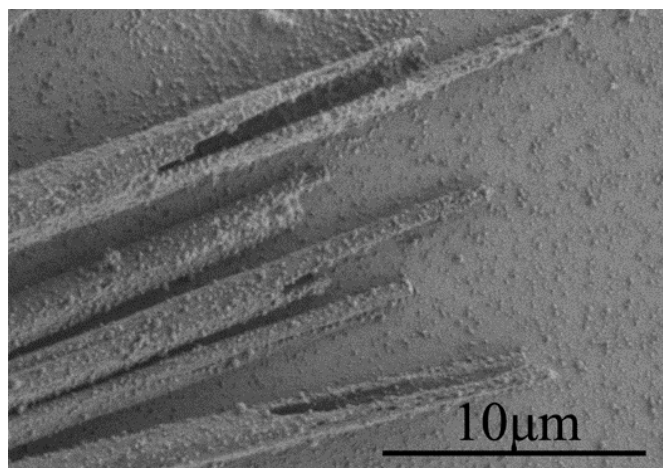

**Fig.S3** SEM images of nanostructures of **L** with the excess concentration of  $\text{Tm}^{3+}$ .

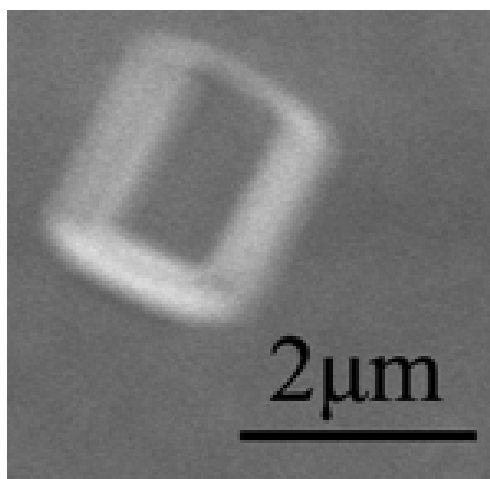

**Fig.S4** SEM image of hexagonal prisms nanostructures when the  $\text{Yb}^{3+}$  was added to acidic aqueous solution of  $\text{pH} = 3$ .

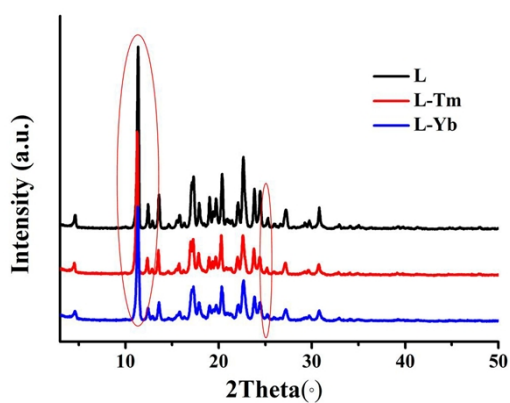

**Fig.S5** XRD patterns of **L** and **L-RE** hybrids.
